# Supplementary material
Source: PubMed Central journal article supplement (PMC4651043)
Supplement: Supp_Fig1.pdf [file Supp_Fig1.pdf]

## Supplementary Data

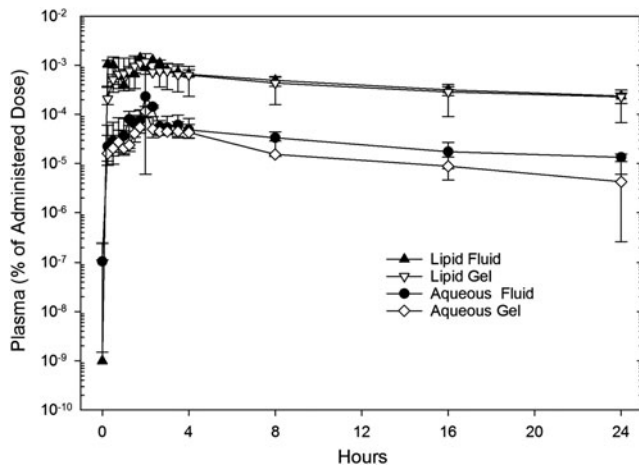

**SUPPLEMENTARY FIG. S1.** Fraction of rectally administered <sup>99m</sup>Tc-radiolabeled DTPA (diethylene triamine pentaacetic acid) detected in plasma over 24 h. Results are median (IQR) for eight research participants in Phase A [no simulated receptive anal intercourse (sRAI)].
