# Supplementary material
Source: PubMed Central journal article supplement (PMC4651043)
Supplement: Supp_Fig2.pdf [file Supp_Fig2.pdf]

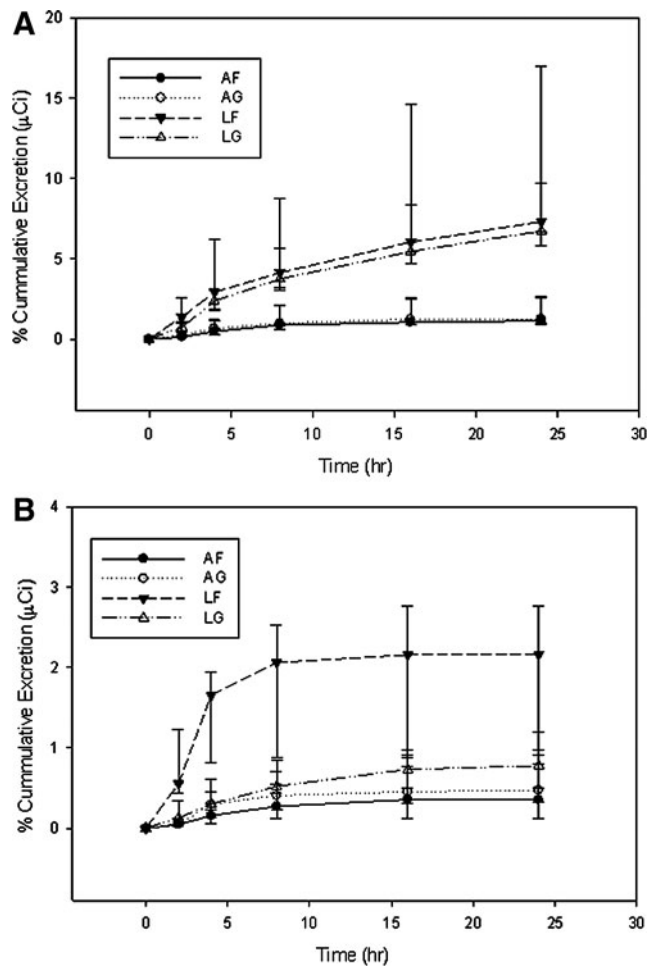

**SUPPLEMENTARY FIG. S2.** Cumulative urine radiolabel collected over 24h postdose expressed as percent of radiolabel retained after the product dose. **(A)** Microbicide vehicle dosing without simulated RAI (Phase A). **(B)** The microbicide vehicle is followed 1h later by simulated RAI (Phase B). Note: the figures are not on the same scale.
